# Supplementary material for: In vivo safety profile and biodistribution of GMP-manufactured human skin-derived ABCB5-positive mesenchymal stromal cells for use in clinical trials
Source: PubMed Central journal article supplement — Cytotherapy. Author manuscript; Available in PMC 2019 May 13. (PMC6513723; doi:10.1016/j.jcyt.2018.12.005), 2019-03-14
Supplement: NIHMS1027450-supplement-1.pdf [file NIHMS1027450-supplement-1.pdf]

Supplementary Table I. Primers and probes.

| Reagent                            | Sequence (5' → 3')                      |
|------------------------------------|-----------------------------------------|
| Subcutaneous biodistribution study |                                         |
| Human-specific                     |                                         |
| Forward primer Cr17_1a             | GGGATAATTTTCAGCTGACTAAACAG              |
| Reverse primer Cr17_4b             | AAACGTCCACTTGCAGATTCTA                  |
| Probe TMsatex_probe                | 6FAM-CACGTTTGAACACTCTTTTTGCAGGATC-TAMRA |
| Mouse-specific                     |                                         |
| Forward primer PTGER2hmf           | TACCTGCAGCTGTACGCCAC                    |
| Reverse primer PTGER2r             | GCCAGGAGAATGAGGTGGTC                    |
| Probe MOUQ01                       | VIC-CCTGCTGCTTATCGTGGCTG-NFQ            |
| Intravenous biodistribution study  |                                         |
| Human-specific                     |                                         |
| Forward primer ACC-25              | GGGATAATTTTCAGCTGACTAAACAG              |
| Reverse primer ACC-26              | AAACGTCCACTTGCAGATTCTA                  |
| Probe ACC-27                       | FAM-CACGTTTGAACACTCTTTTTGCA-BHQ-1       |
| Mouse-specific                     |                                         |
| Forward primer ACC-28              | TACCTGCAGCTGTACGCCAC                    |
| Reverse primer ACC-29              | GCCAGGAGAATGAGGTGGTC                    |
| Probe ACC-30                       | TAMRA-CCTGCTGCTTATCGTGGCTG-BHQ-2        |

Supplementary Table II. Body weight (alive) and selected organ weights of NOD-*scid* mice following three subcutaneous injections of  $1 \times 10^5$ ,  $1 \times 10^6$  or  $1 \times 10^7$  ABCB5<sup>+</sup> MSCs/animal or vehicle without cells on day 1, 29 and 57.

|                        | Vehicle                  | $1 \times 10^5$<br>MSCs/animal              | $1 \times 10^6$<br>MSCs/animal | $1 \times 10^7$<br>MSCs/animal |
|------------------------|--------------------------|---------------------------------------------|--------------------------------|--------------------------------|
| Males                  |                          |                                             |                                |                                |
| Body weight (alive), g |                          |                                             |                                |                                |
| Baseline               | 25.7 (1.6)<br>(n = 15)   | 26.0 (1.4)<br>(n = 10)                      | 25.8 (1.4)<br>(n = 10)         | 25.9 (1.9)<br>(n = 15)         |
| 12 weeks               | 32.7 (1.4)<br>(n = 13)   | 33.2 (1.4)<br>(n = 10)                      | 32.8 (1.8)<br>(n = 10)         | 33.1 (1.5)<br>(n = 15)         |
| 16 weeks               | 33.8 (0.8)<br>(n = 5)    | n/a                                         | n/a                            | 33.2 (3.6)<br>(n = 5)          |
| Organ weight, g        |                          |                                             |                                |                                |
| 12 weeks               | n = 8<br>(thymus: n = 6) | n = 10<br>(spleen: n = 9;<br>thymus: n = 7) | n = 10<br>(thymus: n = 6)      | n = 10<br>(thymus: n = 9)      |
| Brain                  | 0.482<br>(0.010)         | 0.478 (0.016)                               | 0.482 (0.014)                  | 0.475 (0.021)                  |
| Heart                  | 0.167<br>(0.015)         | 0.174 (0.010)                               | 0.170 (0.027)                  | 0.174 (0.023)                  |
| Kidneys                | 0.501<br>(0.044)         | 0.509 (0.040)                               | 0.493 (0.041)                  | 0.516 (0.045)                  |
| Liver                  | 1.478<br>(0.135)         | 1.447 (0.106)                               | 1.438 (0.156)                  | 1.456 (0.134)                  |
| Spleen                 | 0.048<br>(0.010)         | 0.045 (0.007)                               | 0.045 (0.010)                  | 0.037 (0.010)*                 |
| Testes                 | 0.286<br>(0.029)         | 0.281 (0.021)                               | 0.280 (0.030)                  | 0.279 (0.015)                  |
| Thymus                 | 0.051<br>(0.059)         | 0.008 (0.004)*                              | 0.022 (0.021)                  | 0.009 (0.006)*                 |
| 16 weeks               | n = 5                    |                                             |                                | n = 5                          |
| Brain                  | 0.490<br>(0.013)         | n/a                                         | n/a                            | 0.479 (0.026)                  |
| Heart                  | 0.169<br>(0.016)         | n/a                                         | n/a                            | 0.172 (0.032)                  |
|                        | 0.552                    | n/a                                         | n/a                            | 0.514 (0.056)                  |

|         |                  |     |     |               |
|---------|------------------|-----|-----|---------------|
| Kidneys | (0.047)          |     |     |               |
| Liver   | 1.803<br>(0.043) | n/a | n/a | 1.611 (0.146) |
| Spleen  | 0.064<br>(0.011) | n/a | n/a | 0.051 (0.011) |
| Testes  | 0.272<br>(0.014) | n/a | n/a | 0.275 (0.031) |
| Thymus  | 0.096<br>(0.188) | n/a | n/a | 0.013 (0.006) |

---

Females

---

Body weight, g

|          |                        |                        |                        |                        |
|----------|------------------------|------------------------|------------------------|------------------------|
| Baseline | 19.5 (1.6)<br>(n = 15) | 19.6 (1.2)<br>(n = 10) | 19.9 (1.1)<br>(n = 10) | 19.6 (1.5)<br>(n = 15) |
| 12 weeks | 23.6 (2.1)<br>(n = 12) | 24.1 (1.6)<br>(n = 10) | 24.7 (1.7)<br>(n = 10) | 24.5 (1.5)<br>(n = 15) |
| 16 weeks | 23.8 (1.3)<br>(n = 4)  | n/a                    | n/a                    | 23.6 (1.7)<br>(n = 5)  |

Organ weight, g

|          |                          |                           |               |               |
|----------|--------------------------|---------------------------|---------------|---------------|
| 12 weeks | n = 8<br>(thymus: n = 7) | n = 10<br>(thymus: n = 8) | n = 10        | n = 9         |
| Brain    | 0.480<br>(0.027)         | 0.468 (0.024)             | 0.484 (0.017) | 0.478 (0.016) |
| Heart    | 0.125<br>(0.014)         | 0.116 (0.007)             | 0.130 (0.040) | 0.125 (0.008) |
| Kidneys  | 0.276<br>(0.044)         | 0.268 (0.016)             | 0.283 (0.026) | 0.285 (0.018) |
| Liver    | 1.004<br>(0.107)         | 1.056 (0.104)             | 1.031 (0.078) | 0.987 (0.053) |
| Spleen   | 0.038<br>(0.015)         | 0.072 (0.082)             | 0.051 (0.019) | 0.038 (0.008) |
| Thymus   | 0.016<br>(0.007)         | 0.076 (0.169)             | 0.029 (0.033) | 0.034 (0.060) |
| Uterus   | 0.171<br>(0.052)         | 0.161 (0.040)             | 0.154 (0.040) | 0.122 (0.018) |
| 16 weeks | n = 4                    |                           |               | n = 5         |
| Brain    | 0.497<br>(0.015)         | n/a                       | n/a           | 0.483 (0.030) |

|         |                  |     |     |               |
|---------|------------------|-----|-----|---------------|
| Heart   | 0.119<br>(0.008) | n/a | n/a | 0.112 (0.016) |
| Kidneys | 0.286<br>(0.014) | n/a | n/a | 0.264 (0.026) |
| Liver   | 1.073<br>(0.050) | n/a | n/a | 1.004 (0.081) |
| Spleen  | 0.058<br>(0.019) | n/a | n/a | 0.063 (0.019) |
| Thymus  | 0.010<br>(0.004) | n/a | n/a | 0.016 (0.007) |
| Uterus  | 0.159<br>(0.057) | n/a | n/a | 0.132 (0.037) |

---

Values are means (SD); \**P* < 0.05 versus vehicle group, Dunnett's test based on pooled variances. n/a, not applicable. Animals were followed up for 12 weeks. The vehicle and high-dose groups included additional five male and five female mice that were followed up for 16 weeks. Animals that were found dead or were prematurely euthanized due to spontaneous lymphoma development are excluded.

Supplementary Table III. Selected hematology, clinical chemistry and urinalysis parameters of NOD-*scid* mice following three subcutaneous injections of  $1 \times 10^5$ ,  $1 \times 10^6$  or  $1 \times 10^7$  ABCB5<sup>+</sup> MSCs/animal or vehicle without cells on day 1, 29 and 57.

|                                 | Vehicle                            | $1 \times 10^5$<br>MSCs/animal | $1 \times 10^6$<br>MSCs/animal | $1 \times 10^7$<br>MSCs/animal |
|---------------------------------|------------------------------------|--------------------------------|--------------------------------|--------------------------------|
| Males                           |                                    |                                |                                |                                |
| Hematology                      | n = 13                             | n = 10                         | n = 10                         | n = 15                         |
| Hematocrit, %                   | 43.5 (1.1)                         | 43.2 (0.6)                     | 42.8 (1.7)                     | 45.1 (1.0)**                   |
| Hemoglobin, g/dL                | 13.8 (0.3)                         | 13.5 (0.3)                     | 13.4 (0.6)                     | 14.3 (0.4)**                   |
| WBCs, $\times 10^9/L$           | 3.70 (2.27)                        | 2.90 (0.96)                    | 2.21 (1.05)                    | 4.99 (2.08)                    |
| Neutrophils, $\times 10^9/l$    | 2.71 (1.90)                        | 1.85 (0.70)                    | 1.47 (0.91)                    | 3.55 (1.67)                    |
| Lymphocytes,<br>$\times 10^9/l$ | 0.88 (0.38)                        | 0.91 (0.32)                    | 0.66 (0.23)                    | 1.32 (0.44)**                  |
| Monocytes, $\times 10^9/l$      | 0.00 (0.01)                        | 0.01 (0.02)                    | 0.00 (0.00)                    | 0.01 (0.01)                    |
| Eosinophils, $\times 10^9/l$    | 0.10 (0.04)                        | 0.13 (0.06)                    | 0.08 (0.03)                    | 0.11 (0.03)                    |
| Clinical chemistry              | n = 5 (Na <sup>+</sup> ,<br>n = 3) | n = 5                          | n = 5                          | n = 5                          |
| AST, U/L                        | 423.12 (225.85)                    | 703.58 (320.14)                | 618.34 (254.42)                | 510.14<br>(195.72)             |
| ALP, U/L                        | 24.40 (4.04)                       | 24.80 (9.04)                   | 32.80 (5.45)                   | 38.80 (5.12)**                 |
| Urea, mmol/L                    | 15.56 (1.69)                       | 10.88 (1.02)***                | 10.73 (1.77)***                | 12.02 (1.77)**                 |
| Cholesterol,<br>mmol/L          | 2.05 (0.22)                        | 2.44 (0.32)                    | 2.13 (0.17)                    | 2.12 (0.17)                    |
| Triglycerides,<br>mmol/L        | 1.39 (0.50)                        | 1.03 (0.21)                    | 0.64 (0.13)**                  | 0.86 (0.21)*                   |
| Glucose, mmol/L                 | 12.00 (1.78)                       | 11.83 (1.30)                   | 9.80 (1.30)                    | 12.10 (1.06)                   |
| Na <sup>+</sup> , mmol/L        | 155.67 (2.31)                      | 153.00 (3.67)                  | 152.40 (2.61)                  | 154.00 (1.58)                  |
| K <sup>+</sup> , mmol/L         | 6.95 (1.44)                        | 6.62 (0.60)                    | 6.15 (1.39)                    | 6.44 (0.50)                    |
| Ca <sup>2+</sup> , mmol/L       | 2.47 (0.17)                        | 2.43 (0.20)                    | 2.46 (0.06)                    | 2.55 (0.13)                    |
| Albumin, g/L                    | 33.34 (2.02)                       | 33.16 (1.92)                   | 33.74 (1.30)                   | 33.86 (1.21)                   |
| Total protein, g/L              | 49.06 (3.35)                       | 50.66 (3.42)                   | 49.24 (1.50)                   | 51.14 (1.81)                   |
| Urinalysis                      | n = 5                              | n = 5                          | n = 3–5                        | n = 4–5                        |
| Erythrocytes,<br>cells/ $\mu$ L | 6.0 (5.5)                          | 12.0 (21.7)                    | 12.0 (21.7)<br>(n = 5)         | 12.0 (21.7)<br>(n = 5)         |
| Urobilinogen,<br>$\mu$ mol/L    | 38.5 (19.2)                        | 35.0 (0.0)                     | 56.9 (56.0)<br>(n = 4)         | 38.5 (19.2)<br>(n = 5)         |
| Bilirubin, $\mu$ mol/L          | 0.0 (0.0)                          | 3.4 (7.6)                      | 0.0 (0.0)                      | 0.0 (0.0)                      |

|                  |                 |                 |                            |                               |
|------------------|-----------------|-----------------|----------------------------|-------------------------------|
|                  |                 |                 | (n = 4)                    | (n = 5)                       |
| Ketones, mmol/L  | 1.0 (1.4)       | 1.0 (1.4)       | 1.3 (1.4)<br>(n = 4)       | 1.5 (1.4)<br>(n = 5)          |
| pH               | 8.4 (0.9)       | 8.6 (0.9)       | 7.5 (1.3)<br>(n = 3)       | 8.8 (0.5)<br>(n = 4)          |
| Specific gravity | 1.0060 (0.0022) | 1.0050 (0.0000) | 1.0083 (0.0058)<br>(n = 3) | 1.0063<br>(0.0025)<br>(n = 4) |

#### Females

| Hematology                      | n = 12                                              | n = 10               | n = 10                 | n = 15             |
|---------------------------------|-----------------------------------------------------|----------------------|------------------------|--------------------|
| Hematocrit, %                   | 45.2 (3.1)                                          | 43.6 (2.6)           | 41.5 (2.3)**           | 43.9 (3.4)         |
| Hemoglobin, g/dL                | 14.5 (1.2)                                          | 13.6 (0.9)           | 12.9 (1.0)**           | 13.8 (1.1)         |
| WBCs, $\times 10^9/L$           | 1.94 (2.70)                                         | 2.04 (2.85)          | 1.43 (1.06)            | 1.42 (1.13)        |
| Neutrophils, $\times 10^9/L$    | 1.32 (2.44)                                         | 0.72 (0.62)          | 0.79 (0.68)            | 0.72 (0.73)        |
| Lymphocytes,<br>$\times 10^9/L$ | 0.48 (0.20)                                         | 1.12 (2.23)          | 0.49 (0.26)            | 0.54 (0.51)        |
| Monocytes, $\times 10^9/L$      | 0.01 (0.02)                                         | 0.09 (0.26)          | 0.02 (0.02)            | 0.07 (0.28)        |
| Eosinophils, $\times 10^9/L$    | 0.13 (0.12)                                         | 0.10 (0.11)          | 0.14 (0.20)            | 0.09 (0.10)        |
| Clinical chemistry              | n = 4<br>(Na <sup>+</sup> , K <sup>+</sup> , n = 2) | n = 5                | n = 5                  | n = 5              |
| AST, U/L                        | 332.90 (258.10)                                     | 882.08 (530.38)      | 472.78 (223.97)        | 555.94<br>(249.24) |
| ALP, U/L                        | 70.75 (20.76)                                       | 164.20 (253.47)      | 59.40 (17.70)          | 74.20 (22.77)      |
| Urea, mmol/L                    | 8.98 (0.93)                                         | 8.31 (1.31)          | 9.16 (2.44)            | 8.99 (0.96)        |
| Cholesterol,<br>mmol/L          | 1.62 (0.24)                                         | 1.49 (0.30)          | 1.64 (0.05)            | 1.49 (0.22)        |
| Triglycerides,<br>mmol/L        | 0.83 (0.15)                                         | 0.72 (0.20)          | 0.89 (0.25)            | 0.66 (0.16)        |
| Glucose                         | 11.38 (0.87)                                        | 12.71 (1.77)         | 12.82 (1.98)           | 11.12 (0.29)       |
| Na <sup>+</sup> , mmol/L        | 155.50 (0.71)                                       | 162.80 (1.30)**      | 159.60 (1.82)          | 162.60 (3.78)**    |
| K <sup>+</sup> , mmol/L         | 5.68 (0.08)                                         | 6.43 (1.17)          | 5.66 (0.76)            | 5.76 (0.26)        |
| Ca <sup>2+</sup> , mmol/L       | 2.50 (0.11)                                         | 2.60 (0.16)          | 2.48 (0.08)            | 2.37 (0.07)        |
| Albumin, g/L                    | 35.20 (0.98)                                        | 35.06 (1.08)         | 34.82 (2.25)           | 33.60 (1.38)       |
| Total protein, g/L              | 49.05 (2.41)                                        | 47.78 (2.92)         | 46.66 (2.47)           | 46.84 (2.53)       |
| Urinalysis                      | n = 2–4                                             | n = 3–5              | n = 4–5                | n = 5              |
| Erythrocytes,<br>cells/ $\mu L$ | 0.0 (0.0)<br>(n = 2)                                | 0.0 (0.0)<br>(n = 4) | 12.5 (25.0)<br>(n = 4) | 10.0 (22.4)        |
| Urobilinogen,                   | 43.8 (37.1)                                         | 17.5 (0.0)           | 30.6 (8.8)             | 21.0 (7.8)         |

|                   |                            |                            |                            |                               |
|-------------------|----------------------------|----------------------------|----------------------------|-------------------------------|
| µmol/L            | (n = 2)                    | (n = 4)                    | (n = 4)                    |                               |
| Bilirubin, µmol/L | 0.0 (0.0)<br>(n = 2)       | 8.8 (17.5)<br>(n = 4)      | 8.8 (17.5)<br>(n = 4)      | 3.4 (7.6)                     |
| Ketones, mmol/L   | 0.0 (0.0)<br>(n = 2)       | 0.0 (0.0)<br>(n = 4)       | 0.0 (0.0)<br>(n = 4)       | 0.0 (0.0)                     |
| pH                | 8.5 (0.7)<br>(n = 2)       | 8.7 (0.6)<br>(n = 3)       | 8.5 (0.6)<br>(n = 4)       | 8.0 (1.0)                     |
| Specific gravity  | 1.0100 (0.0000)<br>(n = 2) | 1.0117 (0.0029)<br>(n = 3) | 1.0100 (0.0041)<br>(n = 4) | 1.0090<br>(0.0022)<br>(n = 5) |

Values are means (SD); \* $P < 0.05$ , \*\*  $P < 0.01$ , \*\*\*  $P < 0.001$  vs. vehicle group. Hematology was assessed on day 84 (males) and day 85 (females); clinical chemistry and urine were assessed on day 91 (males) and day 92 (females).

Supplementary Table IV. Histopathology findings in NOD-*scid* mice following three subcutaneous injections of  $1 \times 10^7$  ABCB5<sup>+</sup> MSCs/animal or vehicle without cells on day 1, 29 and 57.

| Organ/tissue and findings             | Number of affected/examined animals <sup>a</sup> |          |                                 |          |
|---------------------------------------|--------------------------------------------------|----------|---------------------------------|----------|
|                                       | Vehicle                                          |          | 1 × 10 <sup>7</sup> MSCs/animal |          |
|                                       | 12 weeks                                         | 16 weeks | 12 weeks                        | 16 weeks |
| Males                                 |                                                  |          |                                 |          |
| Systemic neoplasms                    |                                                  |          |                                 |          |
| Lymphoma, malignant                   | 0/8                                              | 1/5      | 0/10                            | 0/5      |
| Injection site                        |                                                  |          |                                 |          |
| Inflammation, chronic, slight         | 0/7                                              | 0/5      | 1/10                            | 1/5      |
| Kidneys                               |                                                  |          |                                 |          |
| Cyst                                  | 0/8                                              | 0/5      | 1/10                            | 0/5      |
| Dilatation, pelvis, slight            | 0/8                                              | 1/5      | 0/10                            | 0/5      |
| Lacrimal glands                       |                                                  |          |                                 |          |
| Inflammation, slight                  | 0/8                                              | 1/5      | 0/10                            | 0/5      |
| Lung                                  |                                                  |          |                                 |          |
| Congestion, slight                    | 0/8                                              | 0/5      | 1/10                            | 0/5      |
| Popliteal lymph nodes                 |                                                  |          |                                 |          |
| Degeneration, moderate                | 0/8                                              | 0/5      | 0/10                            | 1/5      |
| Preputial glands                      |                                                  |          |                                 |          |
| Inflammation, chronic, active, marked | 0/8                                              | 1/5      | 0/10                            | 0/5      |
| Prostate gland                        |                                                  |          |                                 |          |
| Hemorrhage, marked                    | 0/8                                              | 1/5      | 0/10                            | 0/5      |
| Skin/subcutis                         |                                                  |          |                                 |          |
| Hemorrhage, focal, slight             | 0/8                                              | 0/5      | 1/9                             | 0/5      |
| Spleen                                |                                                  |          |                                 |          |
| Congestion, diffuse, moderate         | 0/8                                              | 0/5      | 1/10                            | 0/5      |
| Thymus                                |                                                  |          |                                 |          |
| Atrophy, slight                       | 0/4                                              | 0/1      | 1/5                             | 2/13     |
| Atrophy, moderate                     | 3/5                                              | 0/1      | 1/5                             | 0/3      |
| Atrophy, marked                       | 0/4                                              | 0/1      | 2/5                             | 0/3      |
| Neoplasm, metastatic                  | 0/4                                              | 1/1      | 0/5                             | 0/3      |



| Females                                     |     |     |     |     |
|---------------------------------------------|-----|-----|-----|-----|
| Systemic neoplasms                          |     |     |     |     |
| Lymphoma, malignant                         | 0/8 | 0/4 | 1/9 | 2/5 |
| Eyes                                        |     |     |     |     |
| Inflammation, chronic, unilateral, moderate | 0/8 | 1/4 | 0/9 | 0/5 |
| Kidneys                                     |     |     |     |     |
| Fibrosis, cortex, slight                    | 1/8 | 0/4 | 0/9 | 0/5 |
| Lacrimal glands                             |     |     |     |     |
| Inflammation, chronic, unilateral, slight   | 0/8 | 1/4 | 0/9 | 0/5 |
| Inflammation, chronic, moderate             | 0/8 | 1/4 | 0/9 | 0/5 |
| Lung                                        |     |     |     |     |
| Hemorrhage, slight                          | 0/8 | 0/4 | 1/9 | 1/5 |
| Neoplasm, metastatic                        | 0/8 | 0/4 | 1/9 | 1/5 |
| Thymus                                      |     |     |     |     |
| Atrophy, slight                             | 1/8 | 0/4 | 2/9 | 1/4 |
| Atrophy, moderate                           | 2/8 | 0/4 | 0/9 | 0/4 |
| Hyperplasia, slight                         | 0/8 | 0/4 | 1/9 | 1/4 |
| Neoplasm, metastatic                        | 0/8 | 0/4 | 1/9 | 1/4 |

Animals were followed up for 12 or 16 weeks. Animals that were found dead or were prematurely euthanized due to spontaneous lymphoma development are excluded.

<sup>a</sup>Not all tissues were available from all animals for histopathological examination.
